# Supplementary material
Source: PubMed Central journal article supplement (PMC7609762)
Supplement: 41422_2020_328_MOESM2_ESM.pdf [file 41422_2020_328_MOESM2_ESM.pdf]

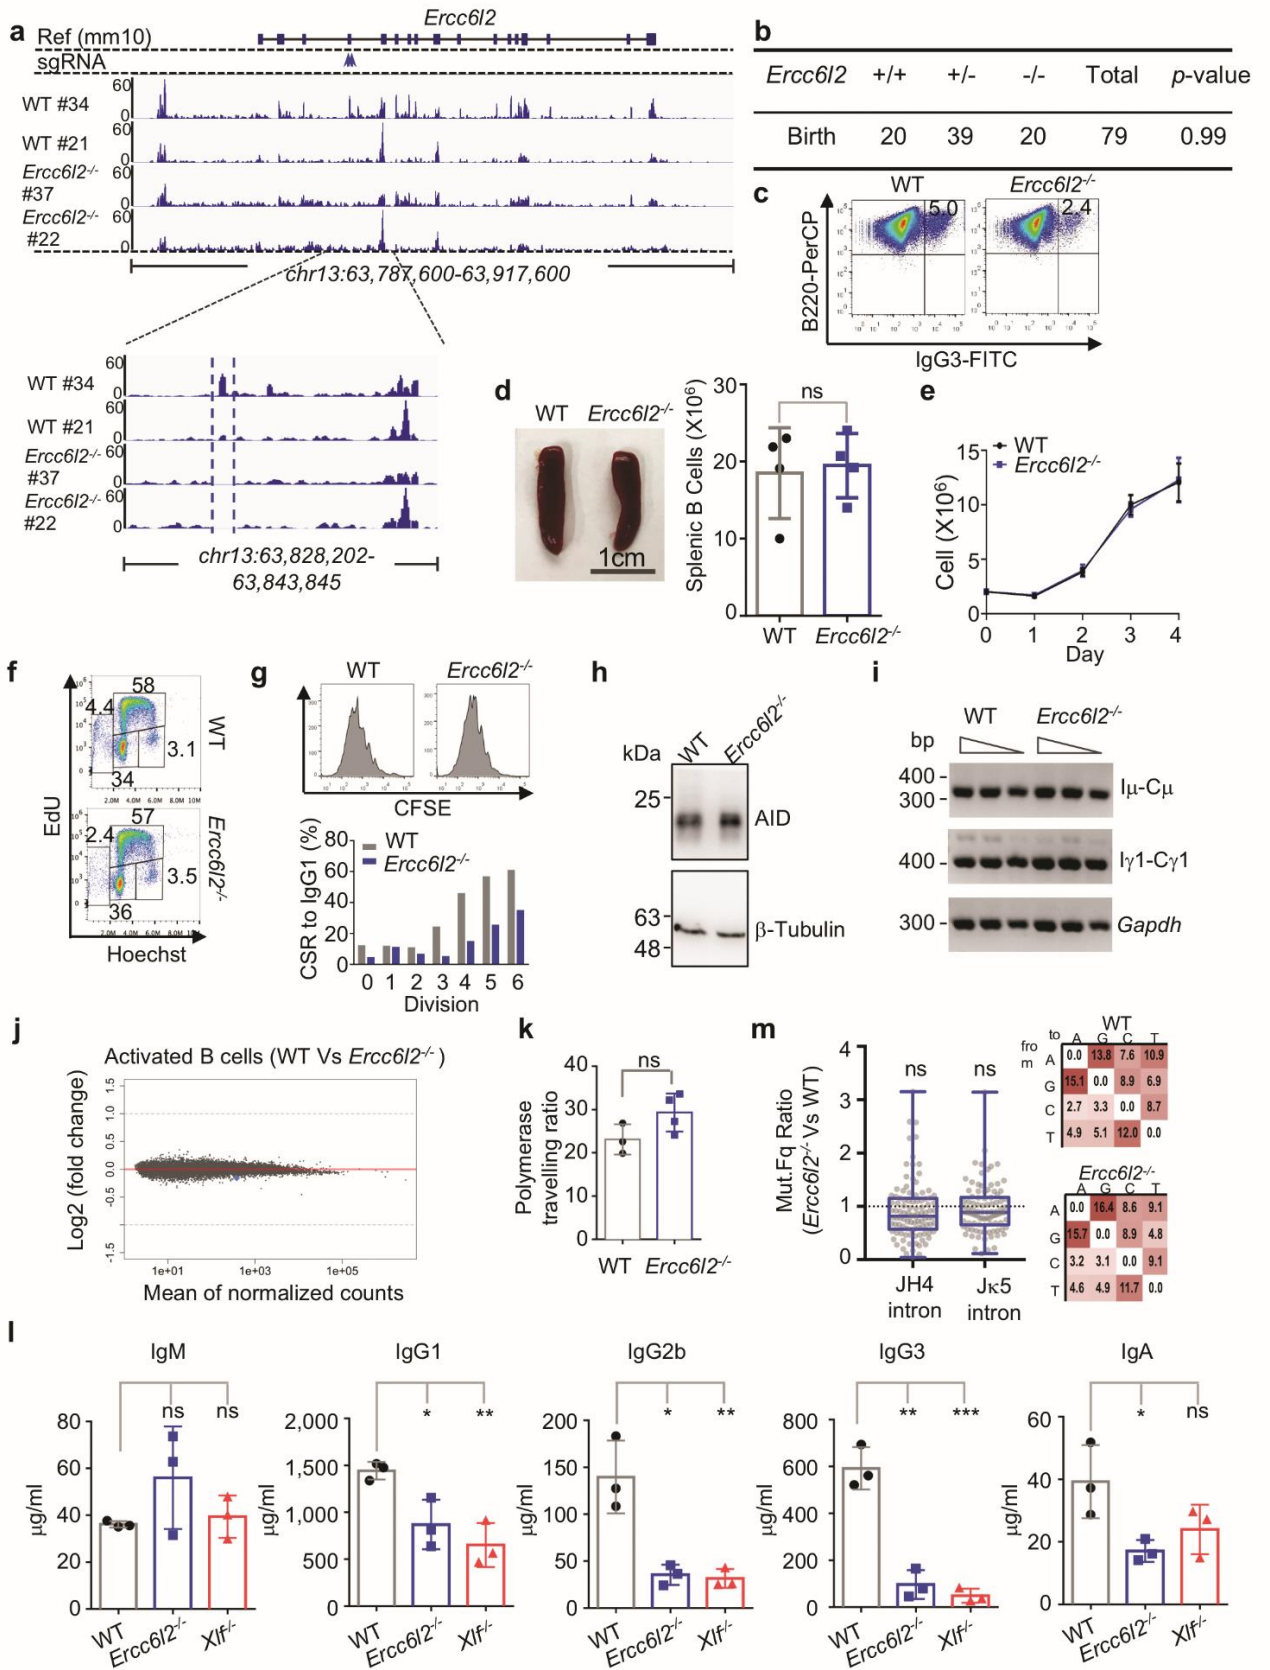

**Fig. S2 ERCC6L2 deficiency leads to defective CSR.** **a** RNA-Seq data of *Ercc6l2* gene in *ex vivo* LPS/IL4-activated B cells with the indicated genotypes are showed with zoom-in views of the knockout-regions at bottom. **b** ERCC6L2 is not required for mouse viability. Numbers of pups are listed, and chi-square test was applied. **c** CSR to IgG3 in *ex vivo* LPS-activated B cells with the indicated genotypes. Representative flow cytometry plots are showed. **d** Size of *Ercc6l2*<sup>-/-</sup> spleen is comparable to the WT spleen (left), and the splenic B cell numbers are not affected by ERCC6L2-deficiency (right). Four pairs of *Ercc6l2*<sup>-/-</sup> and WT mice are tested, and no significant difference was identified (mean ± SD, two-tail unpaired *t*-test). **e** Growth curves of *ex vivo* LPS/IL4-activated B cells with the indicated genotypes. Data are represented as mean ± SEM from five pairs of *Ercc6l2*<sup>-/-</sup> and WT mice. **f** Cell cycle of *ex vivo* LPS/IL4-activated B cells with the indicated genotypes. Cell cycle was determined by flow cytometry analysis of incorporated EdU and DNA content. Representative flow cytometry plots of three repeats are showed. **g** Cell division of *ex vivo* LPS/IL4-activated B cells with the indicated genotypes. Cell division was monitored by CFSE-incorporation analysis. CSR for each cell division is plotted at bottom. **h** AID protein levels in *ex vivo* LPS/IL4-activated B cells with the indicated genotypes. Representative western blot of three repeats is showed. **i** *IgH C* gene germline transcript levels in *ex vivo* LPS/IL4-activated B cells with the indicated genotypes. Representative semi-quantitative RT-PCR result of three repeats is showed. **j** MA plot shows global RNA expression changes between WT and *Ercc6l2*<sup>-/-</sup> activated B cells. X axis indicates mean count of normalized reads, while y axis is log<sub>2</sub>-transformed fold
