# Supplementary material
Source: PubMed Central journal article supplement (PMC7609762)
Supplement: 41422_2020_328_MOESM3_ESM.pdf [file 41422_2020_328_MOESM3_ESM.pdf]

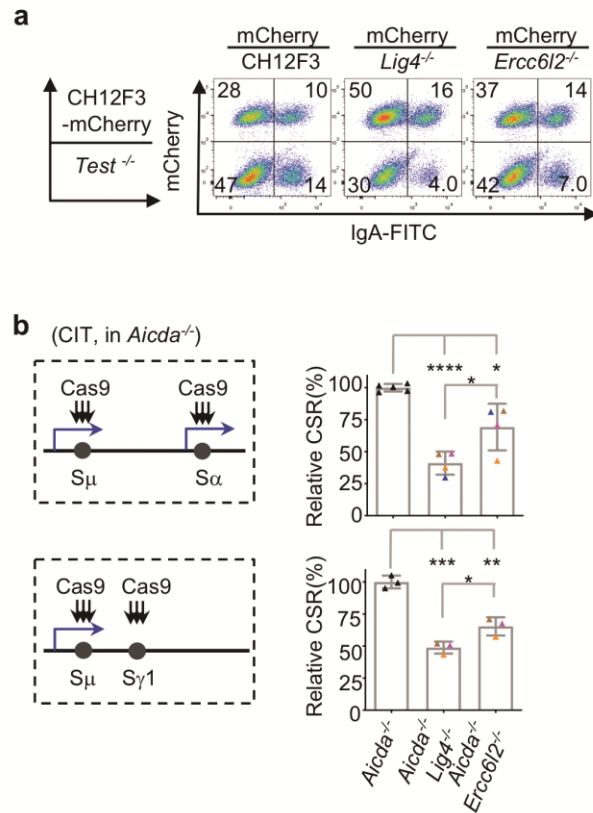

**Fig. S3 Cas9-initiated CSR.** **a** Representative flow cytometry plots of Cas-CSR. **b** ERCC6L2 is required for optimal Cas-CSR. Cas-CSR of indicated genotypes are plotted as in Fig. 2e. Experiments were performed in present cytokine stimulation (CIT). An *Aicda*<sup>-/-</sup> CH12F3-mCherry<sup>+</sup> line was included in Cas-CSR assay to control the transfection efficiency. Data are represented as mean  $\pm$  SD (standard deviation). Two-tail unpaired *t*-test was performed. \*\*\*\*:  $p < 0.0001$ , \*\*\*:  $p < 0.001$ , \*\*:  $p < 0.01$ ; \*:  $p < 0.05$ .
