# Supplementary material
Source: PubMed Central journal article supplement (PMC7609762)
Supplement: 41422_2020_328_MOESM4_ESM.pdf [file 41422_2020_328_MOESM4_ESM.pdf]

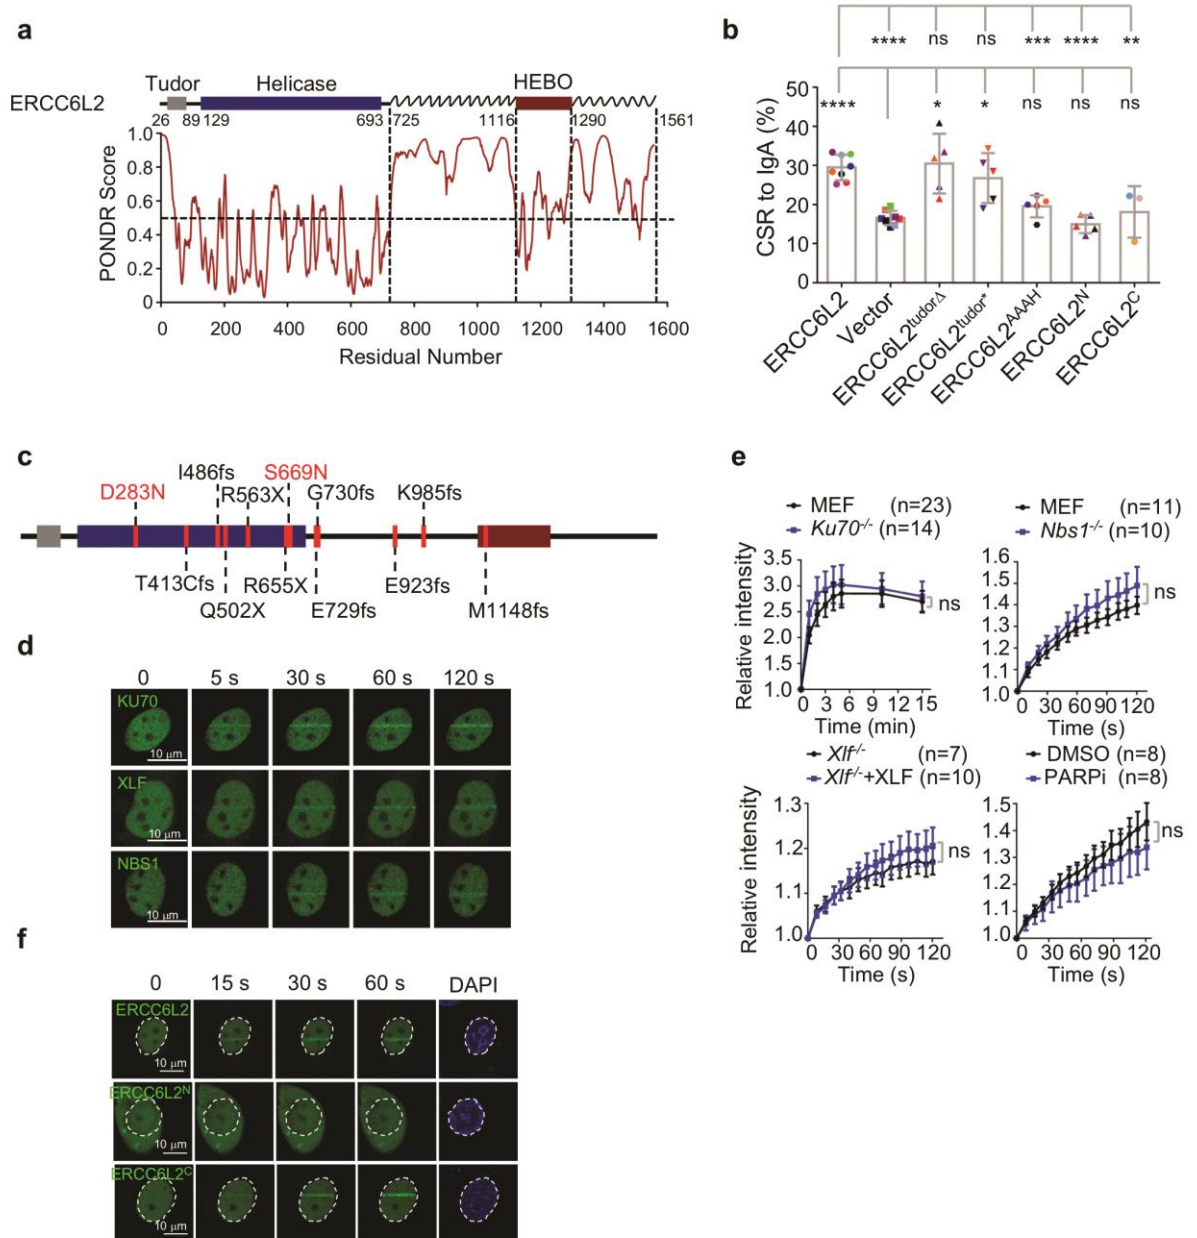

**Fig. S4 Function dissection of ERCC6L2 mutants and their recruitments. a**

ERCC6L2 domain architecture is illustrated on top, and Predictor of Natural Disordered Regions (PONDNR) score is plotted along full-length protein from N terminus to C terminus. **b** AID-initiated CSR to IgA level in ERCC6L2 mutants-complemented B cells are plotted. Two-tail unpaired *t*-test was performed. Data from WT ERCC6L2-complemented B cells and vector control are compared with those from other genotypes. \*\*\*\*:  $p < 0.0001$ , \*\*\*:  $p < 0.001$ , \*\*:  $p < 0.01$ ; \*:  $p < 0.05$ , ns:

$p > 0.05$ . **c** Deleterious mutations identified in ERCC6L2-mutated BMF patients. Data are retrieved from previous reports<sup>26,27,29,30,35</sup>. **d** Representative time-lapse view of KU70/XLF/NBS1 recruitment to DNA damage sites in U2OS cells. **e** Relative fluorescent intensity of ERCC6L2 at DNA damage sites in MEFs of the indicated genotypes. Observed cell numbers (n) are listed. Data are represented as mean  $\pm$  SEM. A *t*-test was performed as described in the method. ns:  $p > 0.05$ . **f** Representative recruitment images of ERCC6L2 and its mutants in *ERCC6L2*<sup>-/-</sup> U2OS cells. Nucleus is circled based on DNA staining.
