# Supplementary material
Source: PubMed Central journal article supplement (PMC7609762)
Supplement: 41422_2020_328_MOESM8_ESM.pdf [file 41422_2020_328_MOESM8_ESM.pdf]

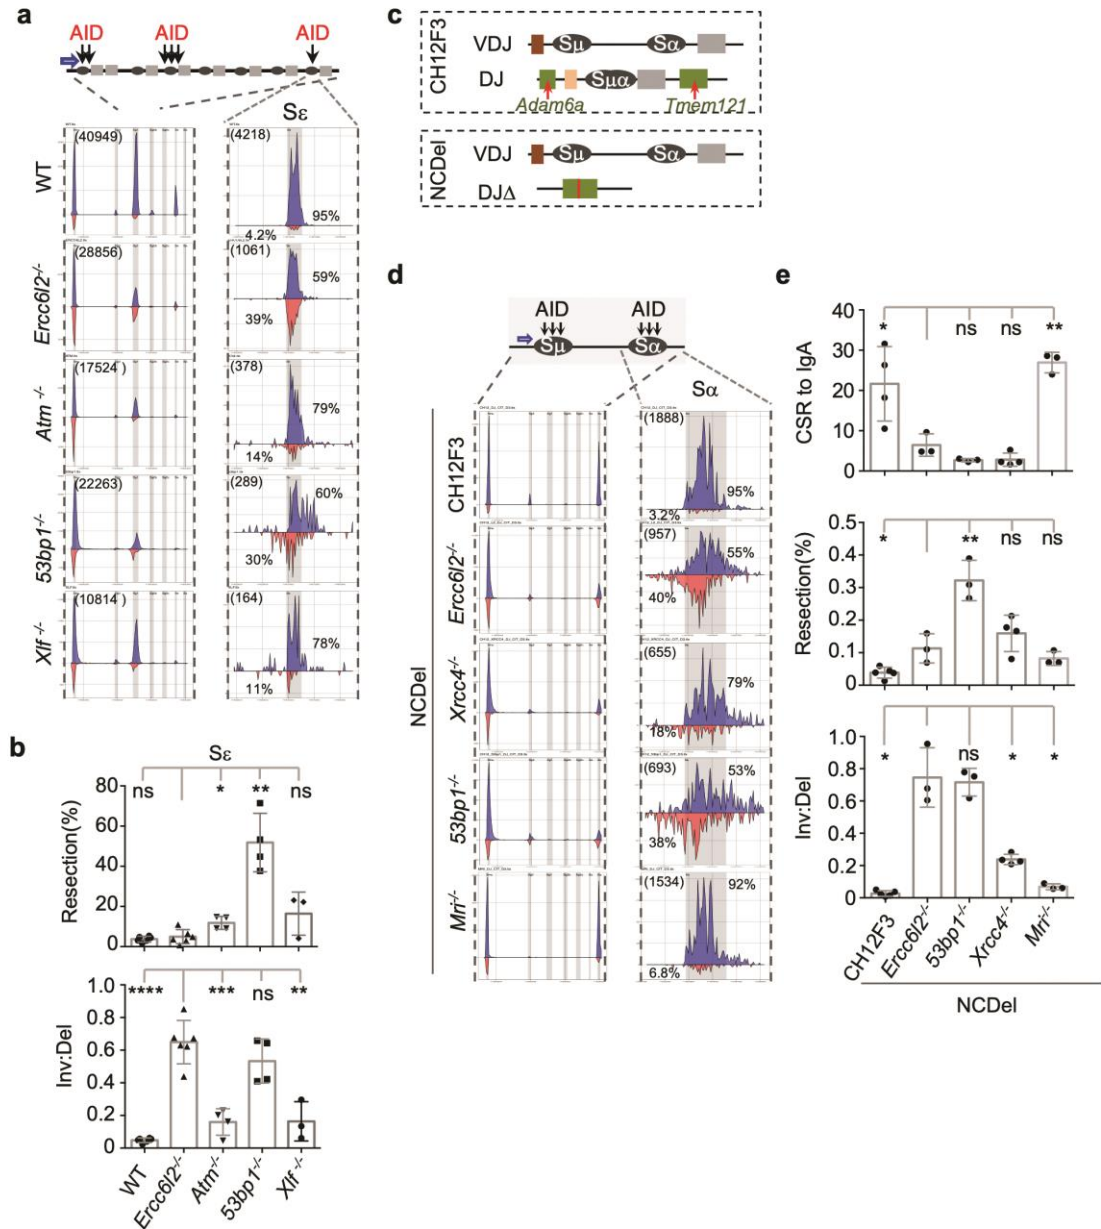

**Fig. S8 ERCC6L2 determines directional CSR.** **a** Distribution of S junctions in CSR-activated B cells. Top, AID targeting (black arrow) in  $S_{\mu}$ ,  $S_{\gamma 1}$  and  $S_{\epsilon}$ , and HTGTS bait site (blue arrow) are depicted. Bottom, linear distribution of pooled junctions along *IgH* locus recovered from LPS/IL4-stimulated B cells. Grey circles indicate S regions. Blue, orientated from left to right; Red, orientated from right to left.

**b** Percentages of resection and inversional/deletional joining ratio of  $S_{\mu}$ - $S_{\varepsilon}$  joining are plotted from top to bottom for the indicated primary B cells. Data are from 3-5 mice.

**c** Schematic illustration of IgH gene structure in CH12F3 and CH12F3-derived NCDel cells. Two sgRNAs used in deletion the DJ non-productive allele are showed by red arrows. **d** Distribution of S junctions in CH12F3-DJ allele knockout (NCDel) cells. Top, AID targeting (black arrow) in  $S_{\mu}$  and  $S_{\alpha}$ , and HTGTS bait site (blue arrow) are depicted. Bottom, linear distribution of pooled junctions along IgH locus recovered from CIT-activated NCDel cells. Grey boxes indicate S regions. Blue, orientated from left to right; Red, orientated from right to left. **e** CSR level, end resection and inversional/deletional joining ratios of  $S_{\mu}$ - $S_{\alpha}$  joining are plotted for the indicated genotypes. Data are summarized as mean  $\pm$ SD in Panels (b) and (e). Two-tail unpaired *t*-test was performed. Data from *Ercc6l2* knockout are compared with those from other genotypes. \*\*\*\*:  $p < 0.0001$ , \*\*\*:  $p < 0.001$ , \*\*:  $p < 0.01$ , \*:  $p < 0.05$ . ns:  $p > 0.05$ .
