# Supplementary material
Source: PubMed Central journal article supplement (PMC7609762)
Supplement: 41422_2020_328_MOESM9_ESM.pdf [file 41422_2020_328_MOESM9_ESM.pdf]

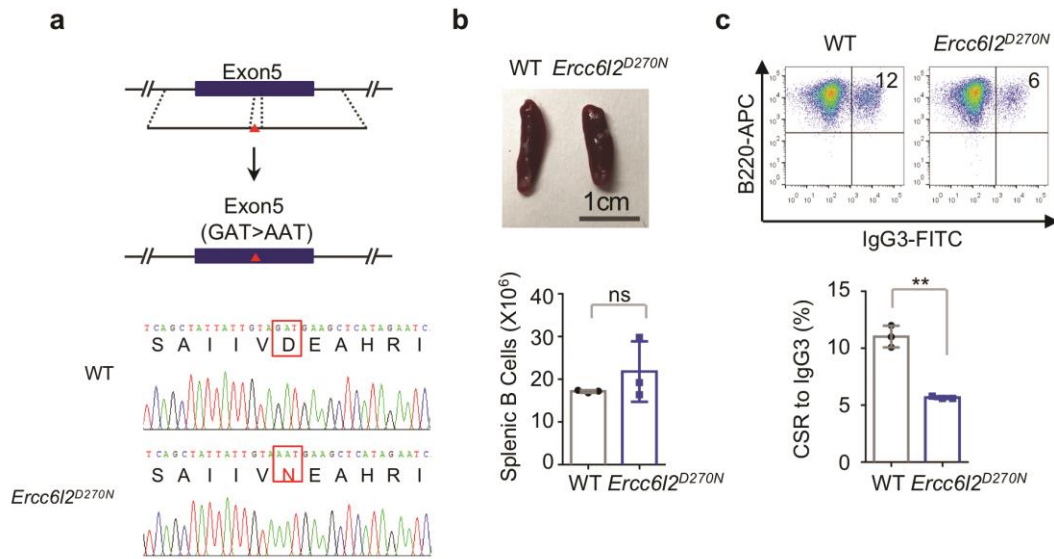

**Fig. S9 *Ercc6l2<sup>D270N</sup>* mouse model.** **a** Construction strategy of *Ercc6l2<sup>D270N</sup>* mouse model. Sequencing chromatograms are showed for *Ercc6l2* Exon 5 in WT and *Ercc6l2<sup>D270N</sup>* mouse. **b** Size of *Ercc6l2<sup>D270N</sup>* spleen is comparable to the WT spleen (upper), and the splenic B cell ratio are not affected in *Ercc6l2<sup>D270N</sup>* mice (lower). Three pairs of *Ercc6l2<sup>D270N</sup>* and WT mice are tested, and no significant difference was identified. **c** CSR levels to IgG3 in CSR-activated WT and *Ercc6l2<sup>D270N</sup>* B cells at Day 4 upon LPS stimulation. Data are summarized as mean  $\pm$ SD in Panels (b) and (c). Two-tail unpaired *t*-test was performed. \*\*:  $p < 0.01$ , ns:  $p > 0.05$ .
